# Supplementary material for: Nanoconfined phosphorus in mesoporous carbon as an electrode for Li-ion batteries: performance and mechanism
Source: Royal Society of Chemistry journal article supplement (doi:10.1039/c2jm34562e), 2012-01-01
Supplement: c2jm34562e.pdf [file c2jm34562e.pdf]

# Nanoconfined Phosphorus in mesoporous Carbon as electrode for Li-ion batteries: performance and mechanism

C. Marino, L. Boulet, P. Gaveau, B. Fraisse, L. Monconduit \*

## Supporting Information

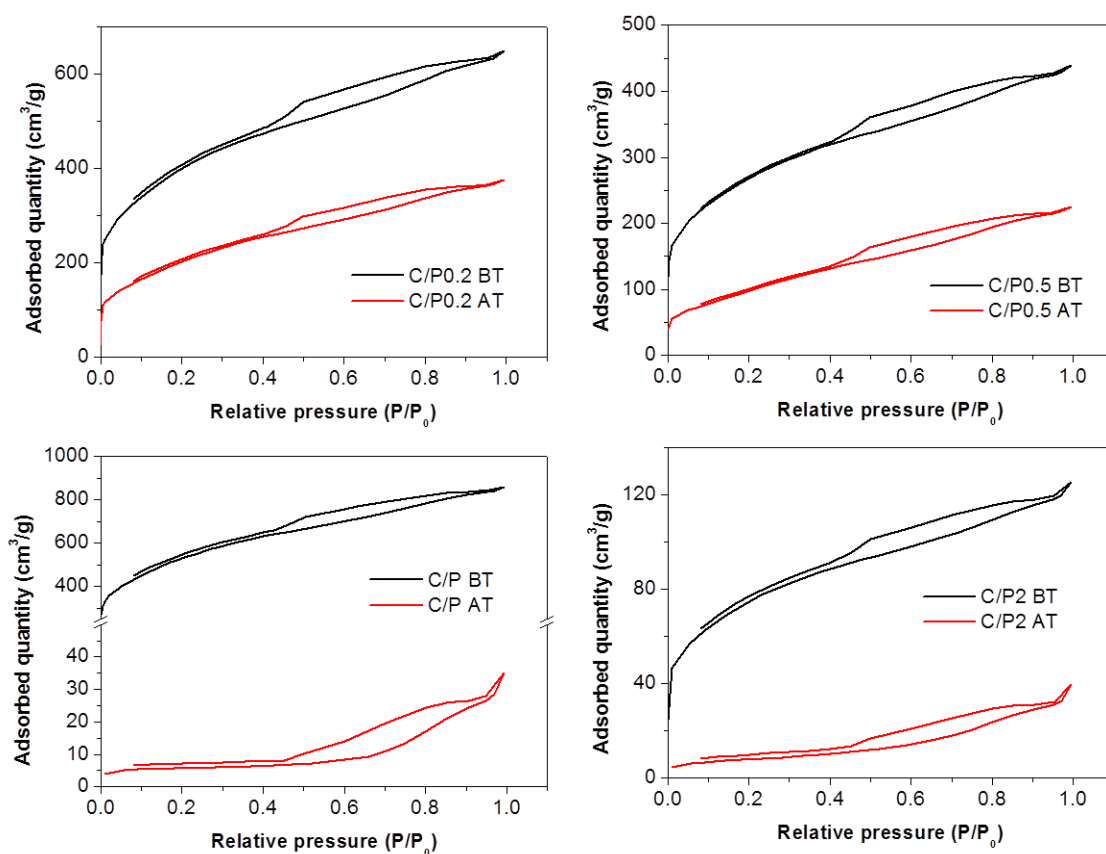

Figure S1: The nitrogen sorption isotherms of the series of P<sub>x</sub>/C<sub>y</sub> composites (for x=0.2, 0.5, 1 and 2)
